# Supplementary material for: Metabolomic Fingerprint of Mecp2-Deficient Mouse Cortex: Evidence for a Pronounced Multi-Facetted Metabolic Component in Rett Syndrome
Source: MDPI journal article supplement (doi:10.3390/cells10092494), 2021-09-21
Supplement: s1 [file s1]

**Supplemental Table S1:** List of all annotated metabolites.

Note that 32 out of the 283 measurements could not be identified unambiguously, as they were annotated to more than one reference compound.

| Metabolite                                                                                         | Log fold change | Average expression | p-value               | Adjusted p-value |
|----------------------------------------------------------------------------------------------------|-----------------|--------------------|-----------------------|------------------|
| L-Proline                                                                                          | 0.910364847     | 19.268619          | $1.02 \times 10^{-6}$ | 0.000143678      |
| L-Glutamic acid                                                                                    | 1.405947697     | 19.8986119         | $2.04 \times 10^{-6}$ | 0.000182672      |
| N-Acetylglutamic acid                                                                              | 1.14608971      | 13.49508312        | $7.33 \times 10^{-7}$ | 0.000143678      |
| Adenosine monophosphate                                                                            | 0.925431723     | 20.92283765        | $3.23 \times 10^{-6}$ | 0.000182672      |
| Adenosine diphosphate                                                                              | 0.925431723     | 20.92283765        | $3.23 \times 10^{-6}$ | 0.000182672      |
| L-Threonine                                                                                        | 1.280944045     | 18.62842653        | $9.24 \times 10^{-6}$ | 0.000355332      |
| L-Glutamylglycine;<br>L-Aspartyl-L-alanine;<br>Glycyl-L-glutamic acid;<br>L-Alanyl-L-aspartic acid | -1.884776605    | 20.42198275        | $8.92 \times 10^{-6}$ | 0.000355332      |
| L-Leucine                                                                                          | 0.869859403     | 17.67189279        | $1.18 \times 10^{-5}$ | 0.000355332      |
| D-Glucose 6-phosphate                                                                              | 2.225577112     | 12.01816324        | $1.23 \times 10^{-5}$ | 0.000355332      |
| Citric acid                                                                                        | 0.872324355     | 18.51228499        | $1.38 \times 10^{-5}$ | 0.000355332      |
| Inositol 1-phosphate                                                                               | 0.959271973     | 13.17443792        | $1.45 \times 10^{-5}$ | 0.000355332      |
| (S)-Methyl-3-hydroxybutanoate                                                                      | 0.934581762     | 16.36377358        | $1.51 \times 10^{-5}$ | 0.000355332      |
| Putrescine                                                                                         | 1.178846798     | 14.87831494        | $2.05 \times 10^{-5}$ | 0.000441438      |
| D-Fructose 1,6-bisphosphate                                                                        | 2.035249928     | 12.80678239        | $2.18 \times 10^{-5}$ | 0.000441438      |
| D-Fructose                                                                                         | 1.167056757     | 15.98535056        | $2.89 \times 10^{-5}$ | 0.000546067      |
| L-Valine                                                                                           | 0.787206983     | 18.17950115        | $3.55 \times 10^{-5}$ | 0.00060476       |
| L-Isoleucine                                                                                       | 0.79431364      | 16.5102761         | $3.63 \times 10^{-5}$ | 0.00060476       |
| L-Homocysteine                                                                                     | -2.331632788    | 19.23053362        | $3.89 \times 10^{-5}$ | 0.000611821      |
| Inosine 5prime-monophosphate                                                                       | 1.157600877     | 15.51293914        | $4.43 \times 10^{-5}$ | 0.000659335      |
| D-Glucose                                                                                          | 1.418283415     | 14.89091169        | $5.85 \times 10^{-5}$ | 0.000800649      |
| Urea                                                                                               | 1.598661908     | 18.09257677        | $6.27 \times 10^{-5}$ | 0.000800649      |
| L-Glutamyl-L-glutamine                                                                             | -1.884904713    | 27.11648733        | $6.07 \times 10^{-5}$ | 0.000800649      |
| 5prime-Deoxy-5prime-(methylthio)adenosine                                                          | 0.732141245     | 12.14648557        | $6.81 \times 10^{-5}$ | 0.000800649      |
| (5Z,8Z,11Z,14Z)-Icosatetra-5,8,11,14-enoic acid                                                    | 1.031702338     | 12.83350372        | $6.63 \times 10^{-5}$ | 0.000800649      |
| L-Rhamnose                                                                                         | 0.805086123     | 15.91103464        | $7.07 \times 10^{-5}$ | 0.000800649      |
| S-Adenosyl methionine                                                                              | -0.993747197    | 23.74037586        | $9.39 \times 10^{-5}$ | 0.001021811      |
| L-Threonic acid                                                                                    | 0.684850562     | 16.7441406         | 0.000100839           | 0.001056943      |
| Xanthine                                                                                           | -0.590421827    | 24.31018454        | 0.000111038           | 0.001122275      |
| Glycerol                                                                                           | 0.74255619      | 19.06670092        | 0.000130275           | 0.001228923      |
| Uracil                                                                                             | -0.903421442    | 21.18827062        | 0.000127396           | 0.001228923      |
| L-Serine                                                                                           | 0.579756565     | 20.90098081        | 0.000144906           | 0.001281509      |
| L-Phenylalanine                                                                                    | 1.142606217     | 16.6882559         | 0.000143034           | 0.001281509      |
| Riboflavin                                                                                         | -1.160626938    | 20.07087316        | 0.000183039           | 0.001569698      |

|                                                                                                                     |              |             |             |             |
|---------------------------------------------------------------------------------------------------------------------|--------------|-------------|-------------|-------------|
| Erythritol                                                                                                          | 0.69635314   | 13.02246792 | 0.000213423 | 0.001776433 |
| Orthophosphate                                                                                                      | 0.611876768  | 20.97105837 | 0.000287398 | 0.002323819 |
| L-Dehydroascorbic acid                                                                                              | 0.691235622  | 21.84685323 | 0.000323978 | 0.002522096 |
| alpha-Ketoglutaric acid                                                                                             | 1.782703728  | 12.7661811  | 0.000331765 | 0.002522096 |
| Succinic acid                                                                                                       | 0.742693312  | 17.42949611 | 0.000338656 | 0.002522096 |
| L-Methionine                                                                                                        | 0.908894628  | 16.36105358 | 0.000407954 | 0.002960279 |
| 1-Methyl-4-Imidazoleacetic acid                                                                                     | -0.837075378 | 21.80343026 | 0.000443631 | 0.003119355 |
| Dopamine                                                                                                            | -1.284697775 | 21.78807503 | 0.000462943 | 0.003119355 |
| D-Mannose;<br>D-Tagatose;<br>D-Galactose;<br>myo-Inositol;<br>allo-Inositol;<br>alpha-D-Talose;<br>D-chiro-Inositol | -1.039213853 | 25.74456344 | 0.000456768 | 0.003119355 |
| Choline                                                                                                             | -0.431043703 | 26.90171757 | 0.000505721 | 0.00332835  |
| L-Malic acid                                                                                                        | 0.694670848  | 17.42147725 | 0.00060495  | 0.003890931 |
| alpha-D-Glucose 1-phosphate                                                                                         | 0.608475547  | 16.33371138 | 0.000649924 | 0.004087301 |
| Acetylcholine                                                                                                       | -0.927272907 | 23.07065289 | 0.000673763 | 0.004145105 |
| Guanidineacetic acid                                                                                                | 0.820712568  | 20.09857657 | 0.000800676 | 0.004799821 |
| Cholesterol                                                                                                         | 1.26134407   | 19.0671946  | 0.000814104 | 0.004799821 |
| gamma-Glutamyl-tyrosine                                                                                             | -1.785159912 | 19.52425254 | 0.000842754 | 0.004867336 |
| L-Phenylalanyl-L-glutamic acid                                                                                      | 0.897985638  | 18.32305035 | 0.000890862 | 0.004972086 |
| L-Tryptophan                                                                                                        | 1.611387398  | 14.88326519 | 0.00089603  | 0.004972086 |
| L-Glutamyl-L-Serine;<br>L-Aspartyl-L-threonine;<br>L-Seryl-L-glutamic acid;<br>L-Threonyl-L-aspartic acid           | -1.150295438 | 19.73175287 | 0.000937591 | 0.005102657 |
| Sucrose                                                                                                             | 6.158042428  | 13.3923006  | 0.001012537 | 0.005406564 |
| 3-Methoxytyramine                                                                                                   | -1.329118853 | 19.23131033 | 0.001059866 | 0.005554481 |
| Hydroxymethylphosphonic acid                                                                                        | -0.787341612 | 23.67877477 | 0.001146676 | 0.005900169 |
| Cysteinylglycine                                                                                                    | -4.027560695 | 21.77167408 | 0.001183926 | 0.005983054 |
| L-Cystine                                                                                                           | 0.873750312  | 11.92833169 | 0.00122662  | 0.00600919  |
| L-Lysine                                                                                                            | -0.351196902 | 24.20427702 | 0.001231565 | 0.00600919  |
| Xylitol                                                                                                             | 0.808853428  | 14.89013391 | 0.001398548 | 0.006708289 |
| L-Valylglycine                                                                                                      | 0.679369707  | 18.35627748 | 0.001506708 | 0.00706882  |
| myo-Inositol 2-phosphate                                                                                            | 0.595473178  | 12.66808989 | 0.001523668 | 0.00706882  |
| Quinic acid                                                                                                         | 0.855868818  | 11.41828108 | 0.001572353 | 0.007144912 |
| Pantothenic acid                                                                                                    | 0.684616238  | 13.36373728 | 0.001590564 | 0.007144912 |
| gamma-Glutamyl-leucine                                                                                              | -0.625316557 | 20.67488703 | 0.001683805 | 0.007445575 |
| L-Homoserine                                                                                                        | 0.68975963   | 13.17477756 | 0.002011208 | 0.008756489 |
| L-Tryptophyl-L-glutamic acid                                                                                        | 1.066921912  | 17.06268455 | 0.002429858 | 0.010418938 |
| O-Acetyl-L-homoserine                                                                                               | -0.757940773 | 25.05720935 | 0.00256228  | 0.010822766 |
| 2-Hydroxypyridine                                                                                                   | 0.676439085  | 18.51302151 | 0.002669588 | 0.011110195 |
| L-Tyrosylglycine                                                                                                    | 0.668551912  | 17.22759761 | 0.002757835 | 0.01131112  |
| Cytidine                                                                                                            | -0.498261918 | 24.93982939 | 0.002828586 | 0.011435569 |

|                                                                                                                                                                                                                  |              |             |             |             |
|------------------------------------------------------------------------------------------------------------------------------------------------------------------------------------------------------------------|--------------|-------------|-------------|-------------|
| 3-Ureidopropanoic acid                                                                                                                                                                                           | -0.797498453 | 16.98390769 | 0.003066315 | 0.012222074 |
| L-Tyrosyl-L-glutamine                                                                                                                                                                                            | 0.694020544  | 16.72809727 | 0.003170807 | 0.012463033 |
| Pyroglutamic acid                                                                                                                                                                                                | 0.419081783  | 23.17766854 | 0.00350977  | 0.013606368 |
| Homoserine lactone;<br>1-Aminocyclopropanecarboxylic acid                                                                                                                                                        | 0.74211736   | 23.15446502 | 0.00381263  | 0.014580734 |
| sn-Glycerol 3-phosphate                                                                                                                                                                                          | 0.543551875  | 19.7500315  | 0.004085449 | 0.01541576  |
| L-Alanine                                                                                                                                                                                                        | 0.468433877  | 21.44703378 | 0.004564538 | 0.016996897 |
| Thiamine pyrophosphate                                                                                                                                                                                           | 0.971660353  | 17.80216496 | 0.004646168 | 0.017076178 |
| L-Tyrosine                                                                                                                                                                                                       | 1.004840045  | 18.15237569 | 0.004949104 | 0.017956364 |
| D-Gluconic acid;<br>D-Galactonic acid                                                                                                                                                                            | -0.57716358  | 21.82861582 | 0.005566274 | 0.019939945 |
| Serotonin                                                                                                                                                                                                        | -0.856307127 | 19.53843285 | 0.006295366 | 0.022269858 |
| 5-Hydroxy-D,L-lysine                                                                                                                                                                                             | -0.540744435 | 16.76212247 | 0.006548181 | 0.022737002 |
| L-Argininosuccinic acid                                                                                                                                                                                          | 0.488731305  | 20.13284785 | 0.006588107 | 0.022737002 |
| L-Carnosine;<br>L-Histidylalanine;<br>L-Alanyl-L-histidine                                                                                                                                                       | -0.510078428 | 23.84237731 | 0.006742973 | 0.022991102 |
| Uric acid                                                                                                                                                                                                        | -0.871941502 | 20.41143074 | 0.007390704 | 0.024899634 |
| L-Prolyl-L-threonine                                                                                                                                                                                             | 0.456035648  | 17.39143136 | 0.007544332 | 0.024909985 |
| Caffeic acid                                                                                                                                                                                                     | 0.846467135  | 11.9550661  | 0.007569819 | 0.024909985 |
| L-Glutamine                                                                                                                                                                                                      | 0.414533575  | 23.02109404 | 0.007928206 | 0.025789453 |
| gamma-Glutamyl-tryptophan                                                                                                                                                                                        | -1.177923893 | 18.30634829 | 0.008127535 | 0.026137415 |
| S-(2-Carboxyethyl)cysteine                                                                                                                                                                                       | -0.91157588  | 19.47881657 | 0.008900643 | 0.027987579 |
| Cytidine monophosphate                                                                                                                                                                                           | 0.4489582    | 24.21657427 | 0.008898191 | 0.027987579 |
| Uridine                                                                                                                                                                                                          | -0.649567915 | 23.35256602 | 0.009635198 | 0.029964406 |
| L-Valyl-L-alanine                                                                                                                                                                                                | 1.01063017   | 18.6355412  | 0.01029879  | 0.031679973 |
| Spermidine                                                                                                                                                                                                       | -0.449078377 | 22.56408946 | 0.010430484 | 0.031740074 |
| D-Fructose 1-phosphate;<br>D-Fructose-6-phosphate;<br>myo-Inositol 2-phosphate;<br>alpha-D-Mannose 1-phosphate;<br>alpha-D-Glucose 1-phosphate;<br>alpha-D-Glucose 6-phosphate;<br>alpha-D-Galactose 1-phosphate | 0.558820403  | 22.05377729 | 0.01091753  | 0.032522746 |
| Spermine                                                                                                                                                                                                         | -1.143593858 | 20.60944719 | 0.010896321 | 0.032522746 |
| Pyruvic acid                                                                                                                                                                                                     | 0.570419873  | 16.74637866 | 0.011257659 | 0.033186641 |
| (3-Carboxypropyl)trimethylammonium                                                                                                                                                                               | -0.226471368 | 25.23419337 | 0.012109628 | 0.035330153 |
| Urocanic acid                                                                                                                                                                                                    | 1.356715892  | 20.98518796 | 0.013189    | 0.038086602 |
| Glyceraldehyde 3-phosphate                                                                                                                                                                                       | 1.960244427  | 19.69145219 | 0.014475453 | 0.041379325 |
| Rutin                                                                                                                                                                                                            | 1.788608378  | 11.19429253 | 0.015037426 | 0.042555916 |
| Guanosine                                                                                                                                                                                                        | -0.55096833  | 26.26155349 | 0.015475131 | 0.04336101  |
| Stearic acid (FA 18:0)                                                                                                                                                                                           | 0.41242329   | 17.34639851 | 0.016057562 | 0.044469661 |
| L-Lysyl-L-glutamic acid                                                                                                                                                                                          | -0.464667625 | 17.41251084 | 0.016185071 | 0.044469661 |
| Xanthosine                                                                                                                                                                                                       | -0.864172112 | 18.29395621 | 0.01648527  | 0.044858955 |
| Palmitic acid (FA 16:0)                                                                                                                                                                                          | 0.457120538  | 17.56149856 | 0.01710802  | 0.046110188 |

|                                                                                |              |             |             |             |
|--------------------------------------------------------------------------------|--------------|-------------|-------------|-------------|
| N-Acetyl-D-glucosamine;<br>N-Acetyl-D-mannosamine;<br>N-Acetyl-D-galactosamine | -0.412035985 | 18.02620754 | 0.018034925 | 0.048149846 |
| Cytidine 5prime-diphosphoethanolamine                                          | -0.248695498 | 23.06352172 | 0.018211465 | 0.048166773 |
| L-Phenylalanyl-L-threonine                                                     | 0.549963989  | 16.79472457 | 0.018417025 | 0.048259427 |
| 1-Methylnicotinamide                                                           | -0.389940475 | 19.48795031 | 0.019070126 | 0.049512345 |
| L-Tyrosyl-L-Threonine                                                          | 0.78708422   | 18.58742469 | 0.019937919 | 0.051294828 |
| alpha-L-Fucose 1-phosphate                                                     | 0.43322505   | 18.82915783 | 0.021782108 | 0.055194714 |
| L-Tyrosyl-L-glutamic acid                                                      | 0.325103968  | 17.19357652 | 0.021843844 | 0.055194714 |
| Nicotinic acid                                                                 | 0.758012388  | 20.2361408  | 0.022382698 | 0.056055784 |
| N-epsilon-Acetyl-L-lysine                                                      | -0.432392877 | 20.49597802 | 0.022892564 | 0.056829787 |
| Inosine                                                                        | -0.317629925 | 28.07012108 | 0.024738424 | 0.060878034 |
| L-Isoleucyl-L-glutamine                                                        | 0.408583998  | 18.67223619 | 0.026528608 | 0.064720656 |
| Cytosine                                                                       | -0.379539169 | 18.84250837 | 0.027579068 | 0.066334106 |
| S-Adenosyl-L-homocysteine                                                      | 0.791297963  | 21.7158033  | 0.027720531 | 0.066334106 |
| O-Phospho-L-serine                                                             | -0.377281948 | 21.56297239 | 0.02789314  | 0.066334106 |
| L-Ornithine                                                                    | 0.716137403  | 19.14741915 | 0.028297154 | 0.066639605 |
| (2S)-2-amino-3-(1-Methyl-1H-imidazol-5-yl)propanoic acid                       | -0.435924287 | 20.76259687 | 0.028492552 | 0.066639605 |
| Pyridoxal-5prime-monophosphate                                                 | 0.575858427  | 19.11444236 | 0.02931851  | 0.068009331 |
| Suberic acid                                                                   | 0.739782503  | 16.71331223 | 0.029887359 | 0.068765225 |
| Glycyl-L-phenylalanine                                                         | -0.374836698 | 18.53844512 | 0.030537511 | 0.069694482 |
| Cystathionine                                                                  | 0.619857418  | 22.28752207 | 0.033281649 | 0.075349652 |
| Adenine                                                                        | -0.224482767 | 25.29713844 | 0.037077221 | 0.083276616 |
| N-epsilon,N-epsilon,N-epsilon-Trimethyllysine                                  | -0.210268312 | 24.21061457 | 0.049981248 | 0.111375536 |
| L-Prolylglycine                                                                | 0.36533213   | 18.89061966 | 0.053364919 | 0.117825334 |
| Cytidine diphosphate                                                           | -0.958696578 | 18.33000485 | 0.053708368 | 0.117825334 |
| 5-(2-Hydroxyethyl)-4-methylthiazole                                            | -0.309122134 | 16.61242141 | 0.054746399 | 0.1191787   |
| Betaine                                                                        | -0.426471245 | 24.25424968 | 0.055950079 | 0.120869255 |
| 3-Hydroxy-3-methylglutaric acid                                                | -0.464477942 | 18.44493994 | 0.058394456 | 0.125194174 |
| Azelaic acid                                                                   | 0.757162352  | 18.9047093  | 0.059179291 | 0.125922852 |
| Sorbitol                                                                       | 3.448546223  | 13.67641652 | 0.060048797 | 0.126819475 |
| Benzoic acid                                                                   | 0.591421583  | 15.037138   | 0.060626132 | 0.126986652 |
| 4-Guanidinobutyric acid                                                        | 0.443544658  | 20.49088725 | 0.061025387 | 0.126986652 |
| D-Maltose;<br>D-Trehalose                                                      | 2.790938455  | 19.70644242 | 0.064000538 | 0.13220549  |
| L-Lysyl-L-serine;<br>L-Seryl-L-lysine                                          | 0.370505672  | 16.91285605 | 0.066391527 | 0.13615074  |
| D-Ribose 5-phosphate                                                           | 0.414422035  | 13.65919217 | 0.0674557   | 0.136504507 |
| L-Threonyl-L-valine                                                            | 0.775123767  | 17.77678373 | 0.068171048 | 0.136504507 |
| 4-Aminobutanoic acid                                                           | 0.24786664   | 22.31316696 | 0.068439641 | 0.136504507 |
| (S)-Lactate                                                                    | 0.228093765  | 23.79639063 | 0.068493428 | 0.136504507 |
| Uridine 5-diphosphoglucose;<br>Uridine 5prime-diphosphogalactose               | -0.239379808 | 24.9095793  | 0.069478064 | 0.137498546 |
| L-Glutamyl-L-threonine                                                         | 0.302300685  | 18.44118959 | 0.070974493 | 0.139484593 |

|                                                                                |              |             |             |             |
|--------------------------------------------------------------------------------|--------------|-------------|-------------|-------------|
| 2-aminoadipate                                                                 | 0.800863145  | 15.31156504 | 0.079029569 | 0.154243917 |
| L-Seryl-L-leucine                                                              | 0.507236279  | 17.31328703 | 0.080826953 | 0.156671423 |
| (S)-Piperidine-2-carboxylic acid                                               | -0.454693462 | 21.40476645 | 0.081496688 | 0.156894984 |
| L-Kynurenine                                                                   | 0.621790223  | 18.69611315 | 0.08235143  | 0.156991328 |
| N-Acetyl-L-methionine                                                          | -0.720368362 | 18.78402303 | 0.08307763  | 0.156991328 |
| Deoxyguanosine                                                                 | -0.357037316 | 16.85451565 | 0.083210951 | 0.156991328 |
| L-Methionyl-L-glutamic acid                                                    | 0.274872002  | 16.74667274 | 0.0858921   | 0.160976585 |
| L-Alanyl-L-leucine                                                             | 0.490342713  | 17.15252343 | 0.08684978  | 0.161700577 |
| D-Ribose 1-phosphate;<br>D-Ribulose 5-phosphate;<br>alpha-D-Xylose 1-phosphate | 0.355405053  | 21.99715189 | 0.093031023 | 0.17207699  |
| Fumaric acid                                                                   | 0.370239998  | 17.56798248 | 0.095677251 | 0.175822481 |
| Uridine diphosphate                                                            | -0.205964832 | 22.19805715 | 0.097170764 | 0.177415008 |
| Panose;<br>Maltotriose;<br>D-Melezitose                                        | -0.39428218  | 18.18038869 | 0.098059572 | 0.177890122 |
| Taurine                                                                        | 0.251256092  | 21.62100626 | 0.101238925 | 0.182487998 |
| Tetronic acid                                                                  | -0.281660618 | 20.82036732 | 0.109560352 | 0.196237846 |
| Cytidine 3prime-phosphate                                                      | -0.2037424   | 20.86691334 | 0.110263807 | 0.196255706 |
| L-Cycloserine                                                                  | -0.21864199  | 18.90000514 | 0.116639615 | 0.206306319 |
| L-Leucyl-L-glutamic acid                                                       | 0.222366043  | 19.08364456 | 0.123818511 | 0.217643718 |
| Saccharopine                                                                   | -0.426239362 | 21.28423647 | 0.132098064 | 0.229672035 |
| L-Cysteine                                                                     | -0.38604679  | 16.9879281  | 0.1322846   | 0.229672035 |
| Allantoin                                                                      | -0.25628377  | 18.58204082 | 0.140543664 | 0.242523517 |
| L-Prolyl-L-serine                                                              | 0.486899265  | 17.88428183 | 0.143067518 | 0.24538247  |
| Thiamine                                                                       | -0.234791328 | 18.44618401 | 0.144611556 | 0.245483696 |
| 2-Methylcitric acid                                                            | -0.305009885 | 16.9187475  | 0.145075223 | 0.245483696 |
| Mannitol;<br>Sorbitol;<br>Galactitol                                           | 2.002549017  | 19.77159292 | 0.145728837 | 0.245483696 |
| 6-Phosphogluconic acid                                                         | 0.347349115  | 19.85087911 | 0.150129365 | 0.251400061 |
| O-Acetyl-L-carnitine                                                           | -0.141578918 | 28.24508256 | 0.155731921 | 0.259247846 |
| L-Seryl-L-aspartic acid                                                        | 0.271594752  | 16.73033434 | 0.158157217 | 0.261745569 |
| Adenosine 5prime-diphosphoglucose                                              | -0.277176755 | 17.20260742 | 0.166179913 | 0.273423927 |
| L-Isoleucyl-L-arginine                                                         | -0.446784308 | 18.05843498 | 0.169988453 | 0.278073596 |
| L-Lysylglycine                                                                 | 0.257015302  | 17.3295692  | 0.175414066 | 0.285299889 |
| Glycyl-L-valine                                                                | -0.25532188  | 17.05209613 | 0.178605212 | 0.288830143 |
| Thymidine                                                                      | -0.272594763 | 17.30096348 | 0.180317258 | 0.289941955 |
| 1-Methylhistamine;<br>3-Methylhistamine                                        | -0.341831945 | 18.61035738 | 0.181401284 | 0.290037081 |
| L-Alanyl-L-threonine;<br>L-Threonyl-L-alanine                                  | -0.216994242 | 19.7337492  | 0.184213091 | 0.292878117 |
| Glycyl-L-tyrosine                                                              | -0.264798088 | 19.1262099  | 0.185869669 | 0.293860984 |
| Glycerol-3-phosphate;<br>beta-Glycerophosphate                                 | -0.121939528 | 24.44080082 | 0.199042619 | 0.312939229 |

|                                                                                                                                                              |              |             |             |             |
|--------------------------------------------------------------------------------------------------------------------------------------------------------------|--------------|-------------|-------------|-------------|
| 5-Aminolevulinic acid;<br>cis-4-Hydroxy-D-proline;<br>trans-3-Hydroxy-L-proline;<br>trans-4-Hydroxy-L-proline                                                | -0.273002058 | 20.58611923 | 0.207912842 | 0.325079194 |
| Nonanoic acid                                                                                                                                                | 0.321176343  | 11.63150154 | 0.213054657 | 0.331288285 |
| Oxalate                                                                                                                                                      | 0.221267312  | 16.88292015 | 0.237289785 | 0.366956334 |
| 2-Aminoethyl-dihydrogen phosphate                                                                                                                            | 0.388049553  | 25.44811468 | 0.243597951 | 0.374664239 |
| Thymidine 5prime-phosphate                                                                                                                                   | 0.132874713  | 17.61013028 | 0.250409932 | 0.383059517 |
| N-Acetylneuraminic acid                                                                                                                                      | -0.127697747 | 24.03802202 | 0.252638078 | 0.384390193 |
| Deoxyuridine                                                                                                                                                 | -0.19656435  | 17.19592557 | 0.256509658 | 0.38819376  |
| L-Aspartylglycine                                                                                                                                            | 0.254090233  | 18.37873498 | 0.261684722 | 0.393919023 |
| N,N-Dimethylglycine;<br>3-Aminoisobutyric acid;<br>(R)-2-Aminobutanoic acid                                                                                  | 0.240180163  | 27.43599785 | 0.267219642 | 0.398016625 |
| N-Acetyl-L-cysteine                                                                                                                                          | -0.554378058 | 17.32169002 | 0.267209223 | 0.398016625 |
| Stachyose;<br>Maltotetraose                                                                                                                                  | -0.306227958 | 17.26257436 | 0.27412469  | 0.406163807 |
| Adenosine 3prime,5prime-cyclic<br>phosphate                                                                                                                  | -0.5090874   | 19.6299343  | 0.279465236 | 0.410763816 |
| Creatine                                                                                                                                                     | -0.107361217 | 32.08303922 | 0.280132214 | 0.410763816 |
| Glycine                                                                                                                                                      | 0.157526417  | 21.21737034 | 0.286478802 | 0.417904644 |
| Hypoxanthine                                                                                                                                                 | 0.371336537  | 25.77080639 | 0.2935553   | 0.426031538 |
| L-Valyl-L-asparagine                                                                                                                                         | 0.246238065  | 16.7975536  | 0.298468244 | 0.430951597 |
| L-Carnitine                                                                                                                                                  | -0.114893328 | 28.46279473 | 0.301372709 | 0.432936429 |
| L-Leucylglycine                                                                                                                                              | 0.559558567  | 19.25290275 | 0.314710374 | 0.449813312 |
| Lignoceric acid (FA 24:0)                                                                                                                                    | 0.287638793  | 10.76693625 | 0.31650514  | 0.450105299 |
| 2-[[Amino(imino)methyl]amino]ethane-1-<br>sulfonic acid                                                                                                      | 0.164176855  | 18.62501903 | 0.327624525 | 0.46167277  |
| L-Seryl-L-isoleucine                                                                                                                                         | 0.209295507  | 18.27821313 | 0.328891416 | 0.46167277  |
| [(3aS,4S,5S,6E,10E,11aR)-6-formyl-5-<br>methoxy-10-methyl-3-methylidene-2-oxo-<br>3a,4,5,8,9,11a-<br>hexahydrocyclodeca[b]furan-4-yl] 2-<br>methylpropanoate | 0.197472753  | 17.40360234 | 0.330114489 | 0.46167277  |
| L-Phenylalanyl-L-glutamine                                                                                                                                   | 0.220418978  | 16.87019526 | 0.331164566 | 0.46167277  |
| L-Aspartic acid;<br>Iminodiacetic acid                                                                                                                       | -0.119727602 | 27.93348998 | 0.33693424  | 0.467413676 |
| L-Alanyl-L-isoleucine                                                                                                                                        | 0.182288852  | 17.15324193 | 0.34990719  | 0.483042609 |
| beta-Alanine                                                                                                                                                 | 0.217722758  | 14.10682074 | 0.367332595 | 0.504636527 |
| Phosphocreatine                                                                                                                                              | 0.140266642  | 23.77139433 | 0.376821285 | 0.511049118 |
| Hexacosanoic acid                                                                                                                                            | 0.175616915  | 12.9437497  | 0.377347303 | 0.511049118 |
| Pyridoxal                                                                                                                                                    | 0.347706888  | 18.40045789 | 0.378158032 | 0.511049118 |
| Nobiletin                                                                                                                                                    | 0.14347851   | 19.22033348 | 0.379223727 | 0.511049118 |
| 2prime-Deoxycytidine-5prime-<br>monophosphate                                                                                                                | 0.145182583  | 18.43209072 | 0.392123443 | 0.525928599 |
| Ascorbic acid                                                                                                                                                | -0.099171523 | 27.94229016 | 0.396346491 | 0.529085174 |

|                                                                                                |              |             |             |             |
|------------------------------------------------------------------------------------------------|--------------|-------------|-------------|-------------|
| L-Glutamyl-L-alanine;<br>L-Alanyl-L-glutamic acid                                              | 0.287383178  | 19.95252448 | 0.406885184 | 0.540603319 |
| Glycyl-L-isoleucine                                                                            | 0.223383035  | 16.6444878  | 0.416671462 | 0.551018803 |
| L-Alanyl-L-valine                                                                              | -0.31406529  | 19.26137989 | 0.422242005 | 0.555788313 |
| Maleamic acid                                                                                  | -0.06879747  | 22.60856983 | 0.427301208 | 0.559525313 |
| p-Hydroxyphenyllactic acid                                                                     | 0.27287364   | 20.56651076 | 0.42903531  | 0.559525313 |
| Sedoheptulose-7-phosphate;<br>(D-Glycero-alpha-D-Manno-<br>Heptopyranosyl)-Dihydrogenphosphate | 0.111447815  | 19.1681878  | 0.444219317 | 0.574036834 |
| L-Alanyl-L-glutamine                                                                           | -0.207188794 | 17.60715722 | 0.44391952  | 0.574036834 |
| Allantoic acid                                                                                 | 0.24635466   | 13.07021586 | 0.447274272 | 0.575357359 |
| Sorbitol-6-phosphate                                                                           | 0.295087782  | 17.91562592 | 0.4600889   | 0.589163614 |
| L-Isoleucyl-L-serine                                                                           | 0.200925562  | 18.3470923  | 0.470028255 | 0.599180163 |
| myo-Inositol                                                                                   | 0.182975533  | 20.91555376 | 0.486289259 | 0.617129419 |
| Histamine                                                                                      | 0.146385397  | 16.34509258 | 0.49194699  | 0.621522313 |
| Anserine                                                                                       | -0.181563823 | 23.59572665 | 0.495673649 | 0.6234473   |
| 5,6-Dihydrothymine                                                                             | -0.224879488 | 17.26050037 | 0.499171966 | 0.62506932  |
| Guanosine diphosphate                                                                          | 0.21777941   | 22.69904781 | 0.510691852 | 0.636677507 |
| L-Alanyl-L-alanine;<br>Gly-gamma-aminobutyric acid                                             | -0.079968801 | 20.24646151 | 0.517940688 | 0.642882521 |
| L-Valyl-L-glutamine                                                                            | 0.087451776  | 18.52988981 | 0.525407519 | 0.648619195 |
| Benzophenone                                                                                   | 0.097047613  | 17.61253914 | 0.528296157 | 0.648619195 |
| L-Alanyl-L-tyrosine;<br>L-Phenylalanyl-L-serine                                                | 0.224084115  | 17.78636549 | 0.529438283 | 0.648619195 |
| N-Acetyl-D-phenylalanine                                                                       | 0.28269008   | 16.8647516  | 0.538934165 | 0.656956186 |
| L-Isoleucyl-L-alanine                                                                          | -0.266186107 | 19.33500414 | 0.5446054   | 0.656956186 |
| Guanine                                                                                        | -0.08556109  | 18.02553266 | 0.546826021 | 0.656956186 |
| L-Seryl-L-valine                                                                               | 0.192702903  | 19.14474587 | 0.546870536 | 0.656956186 |
| L-beta-Imidazolelactic acid                                                                    | 0.209643963  | 19.10859778 | 0.547850388 | 0.656956186 |
| Geraniol;<br>Fenchyl alcohol                                                                   | 0.11687557   | 21.19447782 | 0.562977834 | 0.672247793 |
| Creatinine                                                                                     | 0.047433208  | 24.43087274 | 0.576468403 | 0.685464529 |
| N-Acetyltyrosine                                                                               | -0.15975452  | 16.22813998 | 0.606162019 | 0.7177567   |
| Ergothioneine                                                                                  | 0.072955258  | 22.09382041 | 0.621211881 | 0.732279232 |
| L-Isoleucyl-L-aspartic acid                                                                    | -0.102294241 | 17.40200217 | 0.628338401 | 0.732279232 |
| L-Valyl-L-histidine                                                                            | 0.132541948  | 16.49600753 | 0.628269178 | 0.732279232 |
| Pyridoxamine-5prime-phosphate                                                                  | 0.110000037  | 20.01350748 | 0.629110288 | 0.732279232 |
| Tangeretin                                                                                     | 0.080246118  | 19.12312298 | 0.631364426 | 0.732279232 |
| Nicotinamide                                                                                   | 0.05197329   | 28.86532817 | 0.637856422 | 0.736789255 |
| L-Histidine                                                                                    | -0.063566577 | 24.42788823 | 0.654229165 | 0.752629487 |
| L-Valyl-L-lysine                                                                               | -0.036907908 | 21.86901084 | 0.673616257 | 0.771795145 |
| L-Leucyl-L-alanine                                                                             | 0.111360405  | 16.93668639 | 0.678295359 | 0.774022527 |
| L-Isoleucyl-L-threonine                                                                        | 0.056888057  | 17.42436146 | 0.704701429 | 0.792312209 |
| L-Isoleucyl-L-isoleucine                                                                       | -0.102214095 | 16.71705052 | 0.707152581 | 0.792312209 |
| L-Glutamyl-L-valine;<br>L-Leucyl-L-aspartic acid                                               | -0.060355131 | 17.8925777  | 0.708309945 | 0.792312209 |

|                                                                                                          |                         |             |             |             |
|----------------------------------------------------------------------------------------------------------|-------------------------|-------------|-------------|-------------|
| beta-Nicotinamide-adenine dinucleotide                                                                   | 0.100652088             | 17.10216725 | 0.709180583 | 0.792312209 |
| Deoxycytidine                                                                                            | 0.048201747             | 19.194098   | 0.711084108 | 0.792312209 |
| L-Aspartyl-L-glutamine;<br>L-Asparaginy-L-glutamic acid                                                  | -0.072020438            | 19.28502195 | 0.711121205 | 0.792312209 |
| 5-Hydroxyindole-3-acetic acid                                                                            | 0.070323523             | 19.53104177 | 0.72124195  | 0.800437145 |
| L-Isoleucyl-L-lysine                                                                                     | 0.068316414             | 16.62637454 | 0.727835673 | 0.803147187 |
| L-Valyl-L-serine                                                                                         | -0.104640942            | 18.41354809 | 0.729359813 | 0.803147187 |
| L-Prolyl-L-glutamic acid                                                                                 | 0.042081428             | 19.8964025  | 0.752536558 | 0.825456767 |
| L-Leucyl-L-threonine                                                                                     | 0.10189654              | 17.18343701 | 0.758964084 | 0.829292802 |
| L-Arginine                                                                                               | -0.045078635            | 26.08503146 | 0.779394761 | 0.848341221 |
| trans-4-Hydroxy-L-proline                                                                                | 0.094319125             | 13.91254925 | 0.788708359 | 0.855189523 |
| D-Saccharic acid                                                                                         | 0.064947098             | 23.28066932 | 0.806169823 | 0.870786489 |
| D-Panthenol                                                                                              | -0.233323028            | 19.27129437 | 0.826433082 | 0.889279704 |
| L-Glutamyl-L-aspartic acid                                                                               | 0.032933153             | 18.30391916 | 0.836559484 | 0.896766416 |
| 4-Pregnene-11-beta-17-alpha-diol-3-20-dione;<br>(9xi,11beta,14xi)-11,21-Dihydroxypregn-4-ene-3,20-dione  | -0.041279007            | 16.93100044 | 0.864817922 | 0.923560271 |
| L-Citrulline                                                                                             | 0.024327373             | 21.06589883 | 0.869914755 | 0.925510811 |
| Phosphoglycolic acid                                                                                     | 0.028960261             | 16.66548934 | 0.879497897 | 0.931289502 |
| Hypotaurine                                                                                              | -0.031148133            | 20.28218628 | 0.881927868 | 0.931289502 |
| 2-Deoxyadenosine 5-phosphate                                                                             | 0.02375839              | 18.07875758 | 0.889021997 | 0.935290799 |
| L-Isoleucyl-L-glutamic acid                                                                              | -0.014868483            | 17.76992983 | 0.901587172 | 0.944996925 |
| Nerolidol                                                                                                | 0.017408927             | 18.73242769 | 0.907819996 | 0.948018667 |
| L-Valyl-L-aspartic acid                                                                                  | -0.016311975            | 18.73588535 | 0.930616698 | 0.968251933 |
| D-Galactose;<br>myo-Inositol;<br>allo-Inositol;<br>muco-Inositol;<br>alpha-D-Talose;<br>D-chiro-Inositol | -0.015170368            | 24.65683218 | 0.935056563 | 0.969307719 |
| 5-Aminoimidazole-4-carboxamide-1-beta-D-ribofuranosyl                                                    | 0.017776888             | 18.38152973 | 0.943904694 | 0.972917594 |
| N-Methylnicotinic acid                                                                                   | -0.016113135            | 22.60709829 | 0.94544463  | 0.972917594 |
| L-Threonyl-L-isoleucine                                                                                  | 0.019577629             | 16.82985874 | 0.948852494 | 0.972917594 |
| D-2-Aminoadipic acid;<br>N-Methyl-L-glutamic acid                                                        | 0.018391918             | 24.25602673 | 0.960639228 | 0.981447298 |
| L-Asparagine                                                                                             | $-7.25 \times 10^{-16}$ | 20.26068609 | 1           | 1           |
| N-Acetyl-L-aspartic acid                                                                                 | 0.001246033             | 29.29685449 | 0.988965369 | 1           |
| 2-Aminophenol                                                                                            | $-6.01 \times 10^{-18}$ | 17.31210201 | 1           | 1           |
| L-Valyl-L-glutamic acid                                                                                  | -0.001462613            | 19.15888345 | 0.99457281  | 1           |
| L-Phenylalanyl-L-valine                                                                                  | $-4.85 \times 10^{-15}$ | 16.96386906 | 1           | 1           |
| D-Trehalose;<br>D-Gentiobiose                                                                            | $-2.67 \times 10^{-15}$ | 19.29362673 | 1           | 1           |
